# Supplementary material for: Subclinical Signs of Retinal Involvement in Hereditary Angioedema
Source: MDPI journal article supplement (doi:10.3390/jcm10225415), 2021-11-19
Supplement: s1 [file s1]

**Table S1.** Mutations in C11NH gene in the study population.

| Patient [sex] | Mutations in C11NH gene |
|---------------|-------------------------|
| 1 [F]         | c.1214T>C/L405P         |
| 2 [F]         | c.1214T>C/L405P         |
| 3 [M]         | c.1414C>T/R472X         |
| 4 [F]         | c.1414C>T/R472X         |
| 5 [F]         | c.1414C>T/R472X         |
| 6 [F]         | c.1414C>T/R472X         |
| 7 [M]         | c.1414C>T/R472X         |
| 8 [M]         | c.376G>T/D126Y          |
| 9 [M]         | c.524T>A/L175H          |
| 10 [M]        | c.656G>C/R219P          |
| 11 [F]        | c.delG1412              |
| 12 [F]        | c.delG1412              |
| 13 [M]        | c365>A/s115X            |
| 14 [F]        | c365>A/s115X            |
| 15 [M]        | g.5528G>A/IV3-5         |
| 16 [M]        | g.5528G>A/IV3-5         |
| 17 [F]        | g.5528G>A/IV3-5         |
| 18 [F]        | g.5528G>A/IV3-5         |
| 19 [F]        | g.5528G>A/IV3-5         |
| 20 [F]        | g.5528G>A/IV3-5         |
| 21 [F]        | g.5528G>A/IV3-5         |
| 22 [F]        | g.5528G>A/IV3-5         |
